# Supplementary material
Source: PubMed Central journal article supplement (PMC3655473)

Fig. 1A

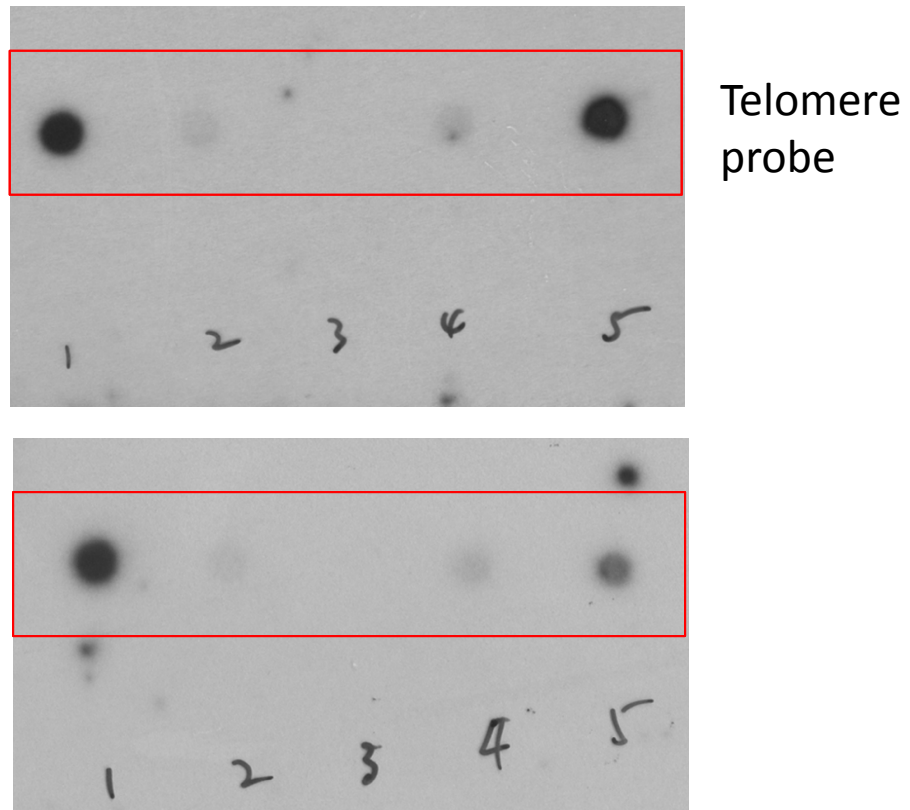

Fig. 1C

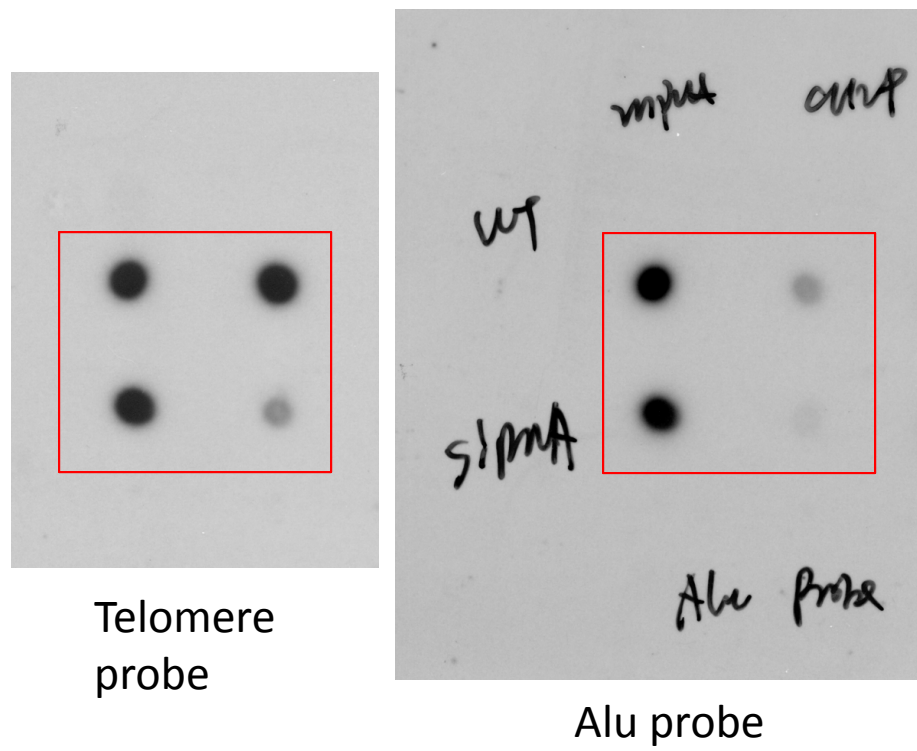

Supplement: emboj201388df1.pdf [file emboj201388df1.pdf]

**Fig. 2A**

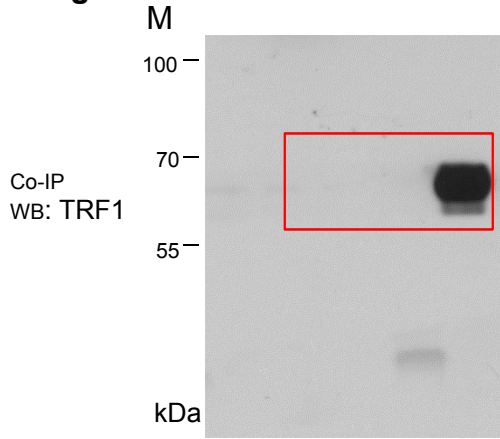

**Fig. 2B**

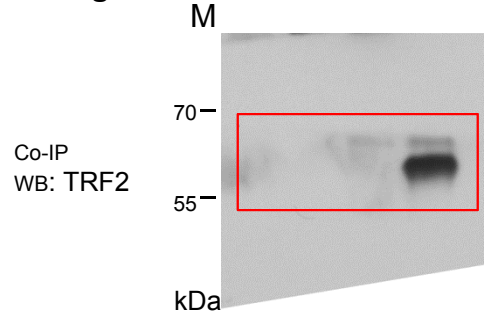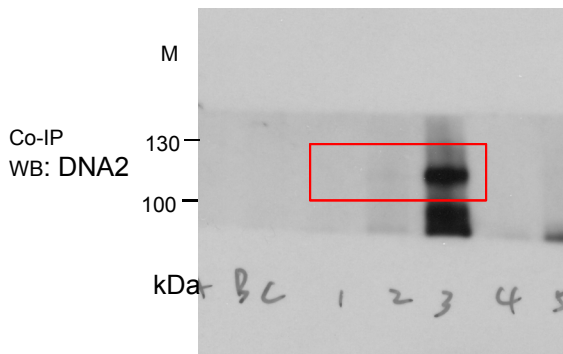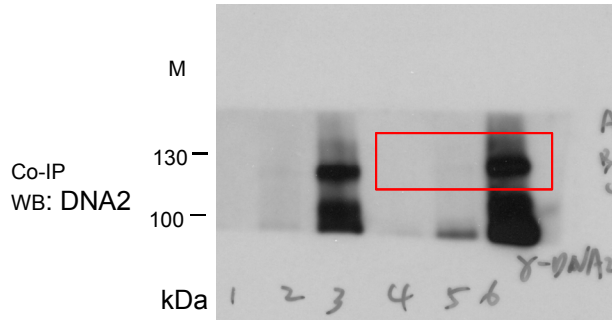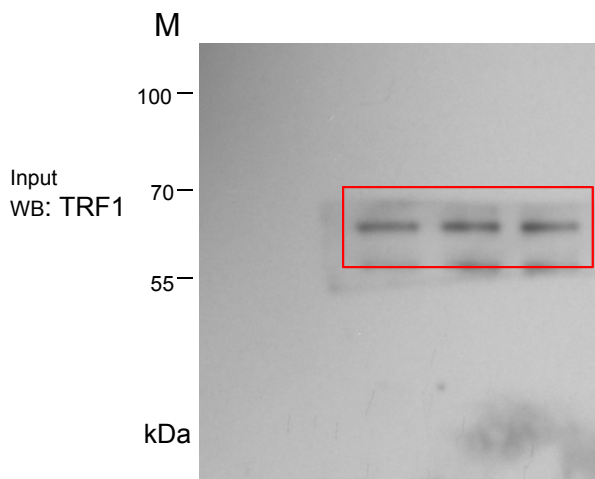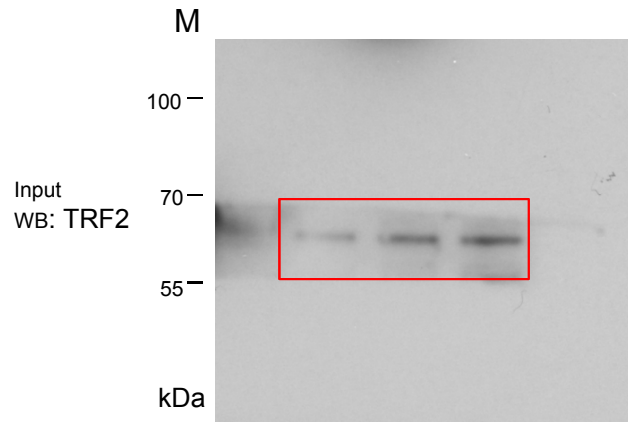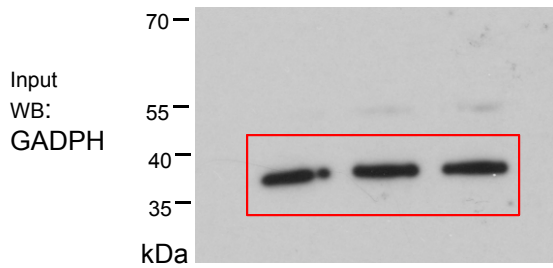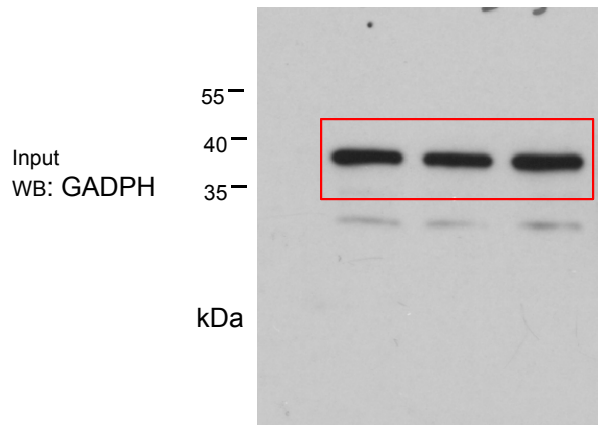

**Fig. 2C**

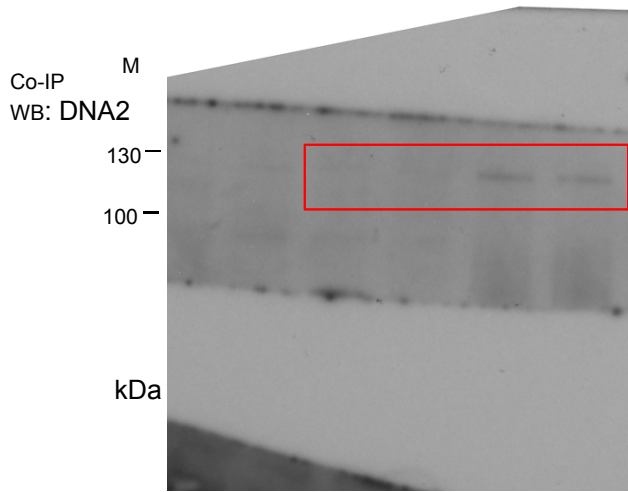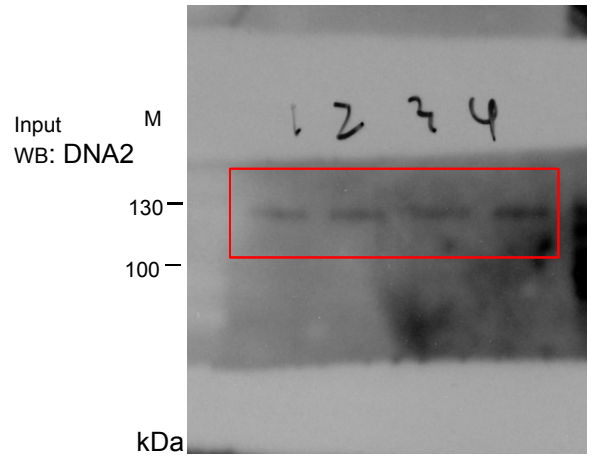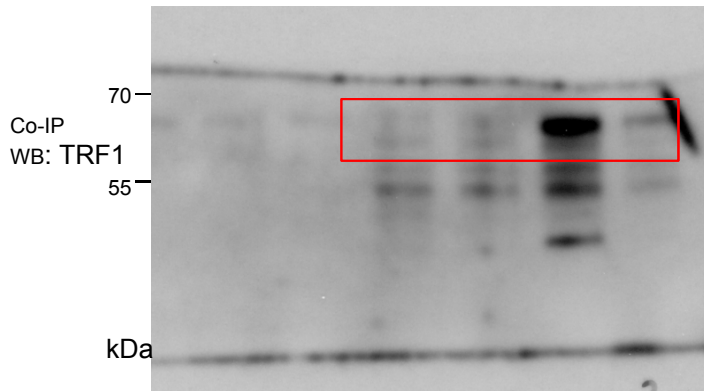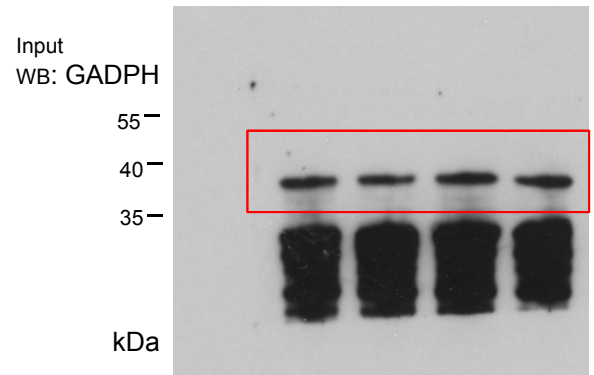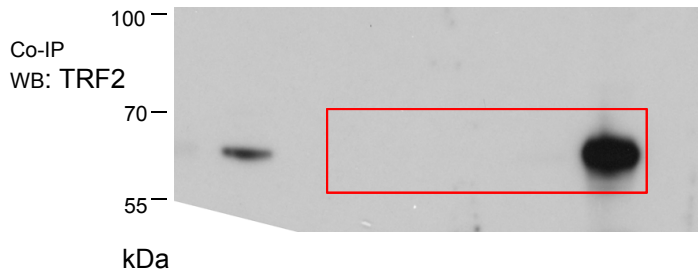

**Fig. 2D**

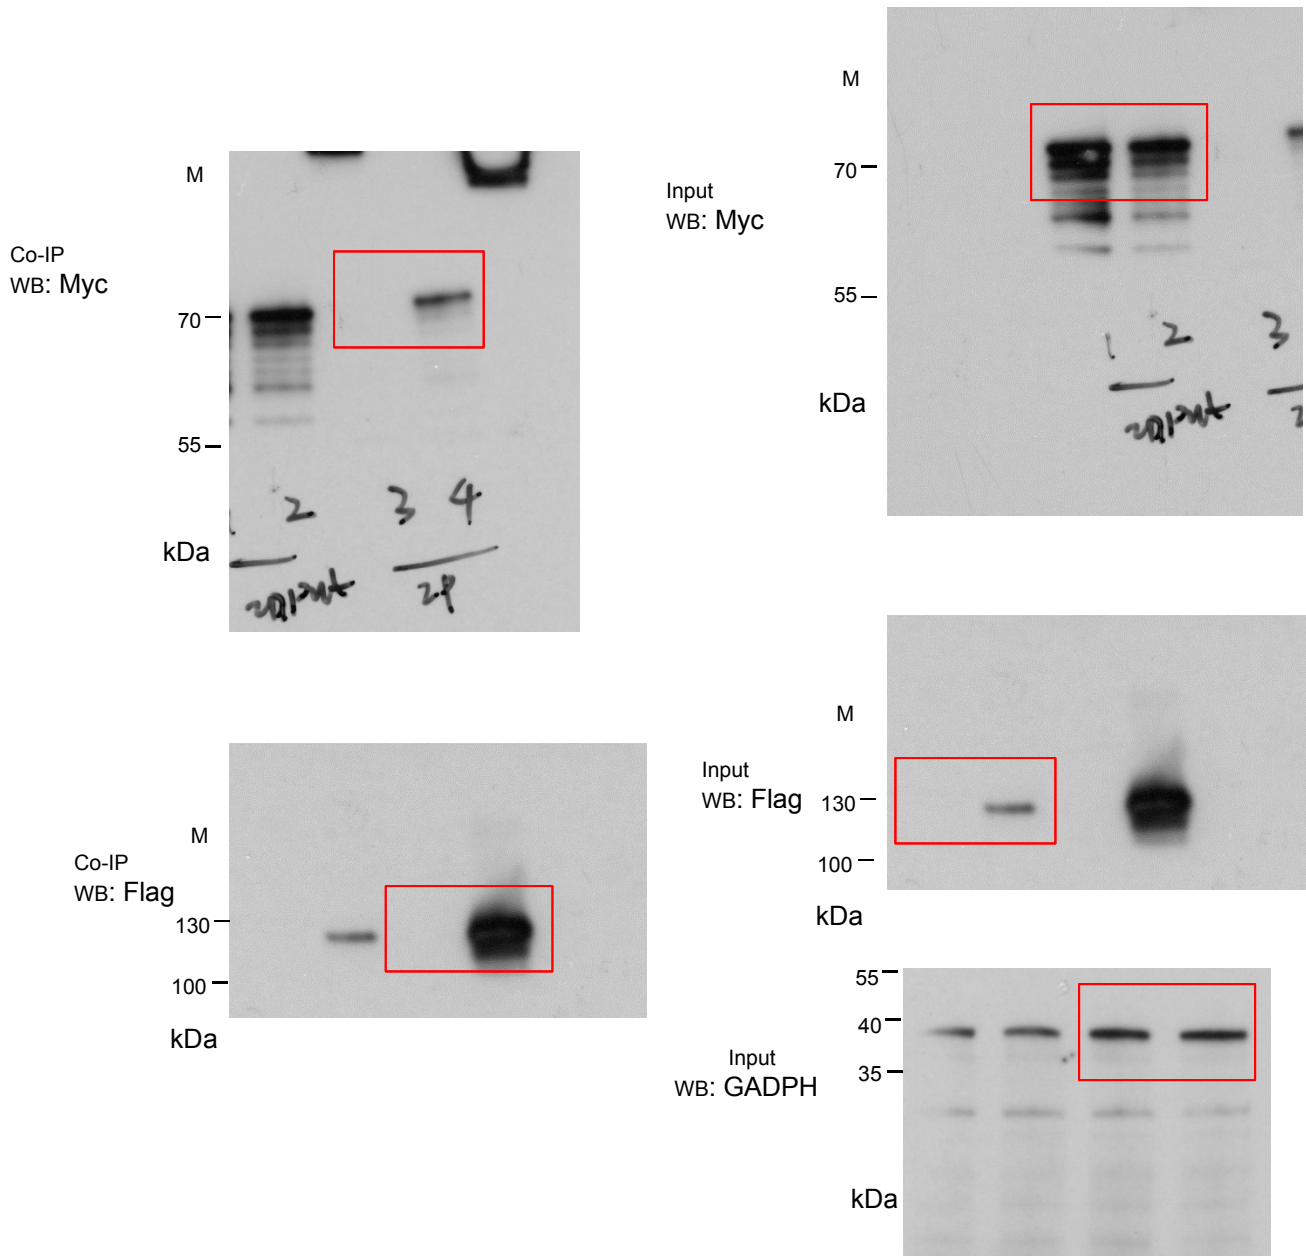

**Fig. 2E**

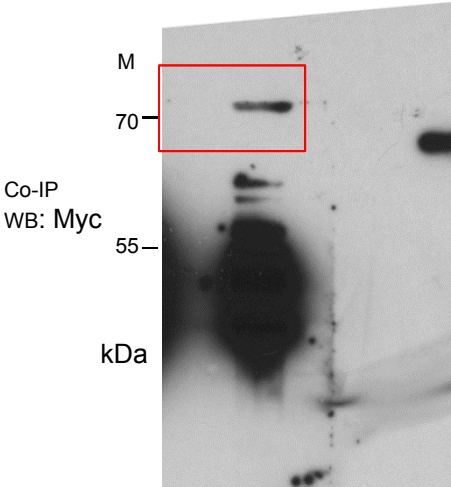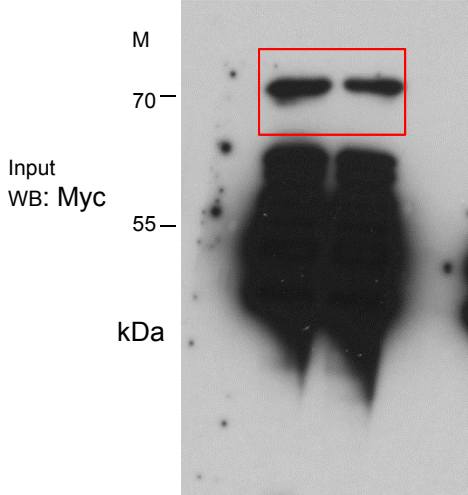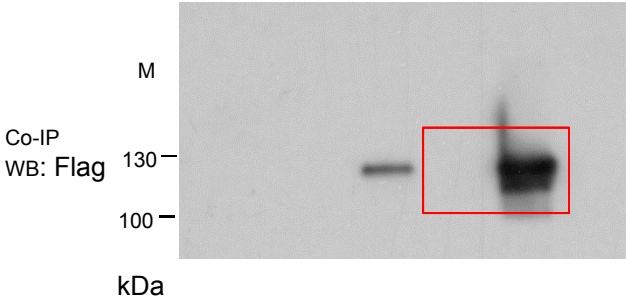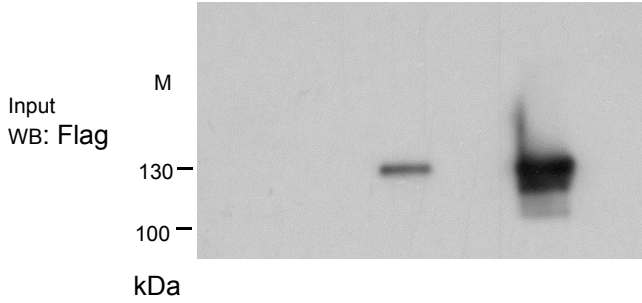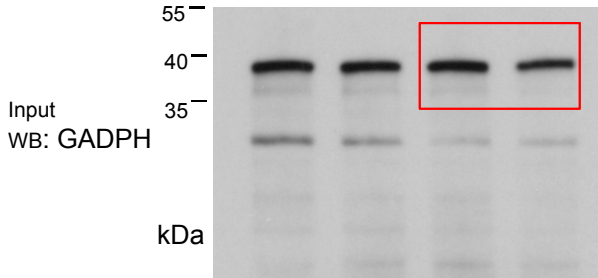

Supplement: emboj201388df2.pdf [file emboj201388df2.pdf]

**Fig. 3B**

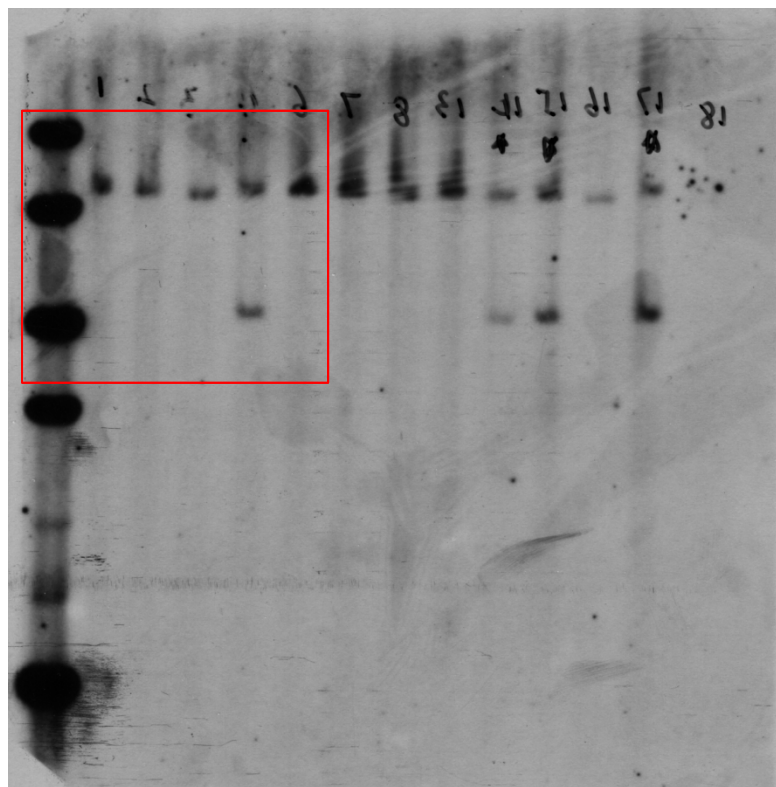

**Fig. 3C**

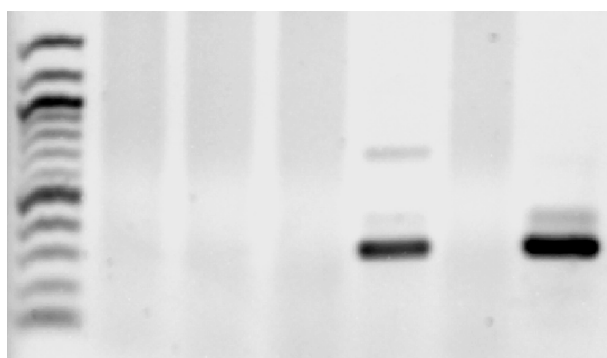

**Fig. 3D**

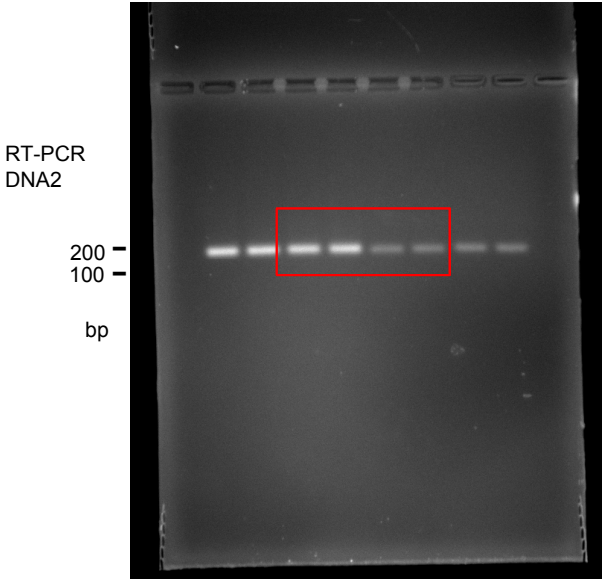

**Fig. 3E**

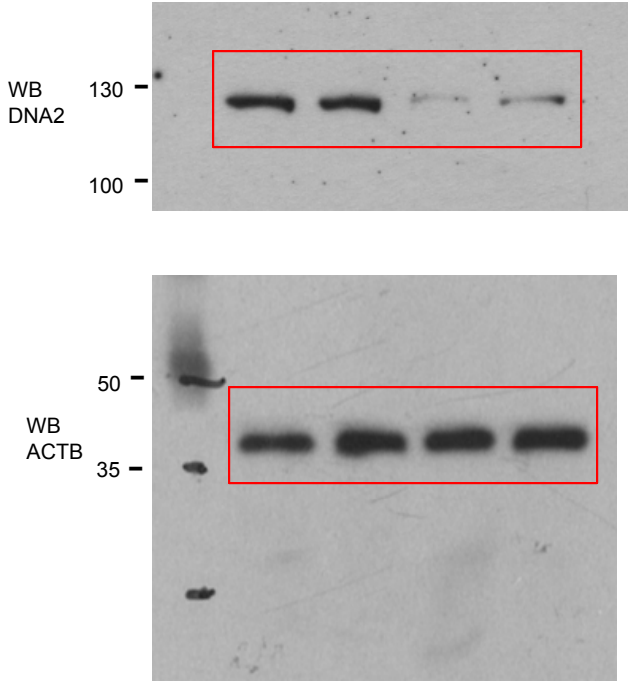

RT-PCR  
GADPH

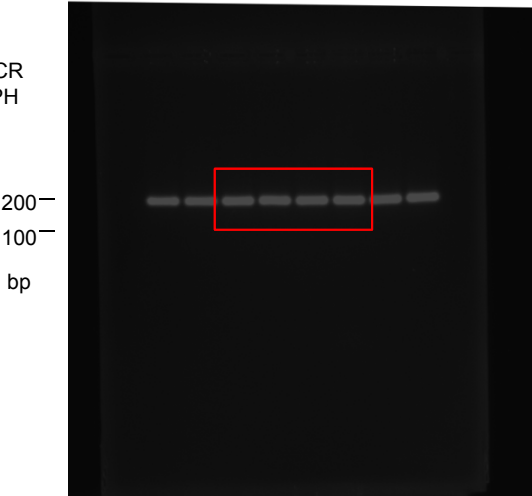

Supplement: emboj201388df3.pdf [file emboj201388df3.pdf]

**Fig. 5A**

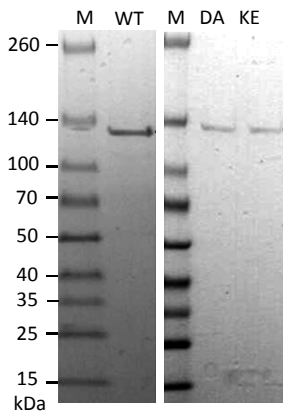

**Fig. 5C**

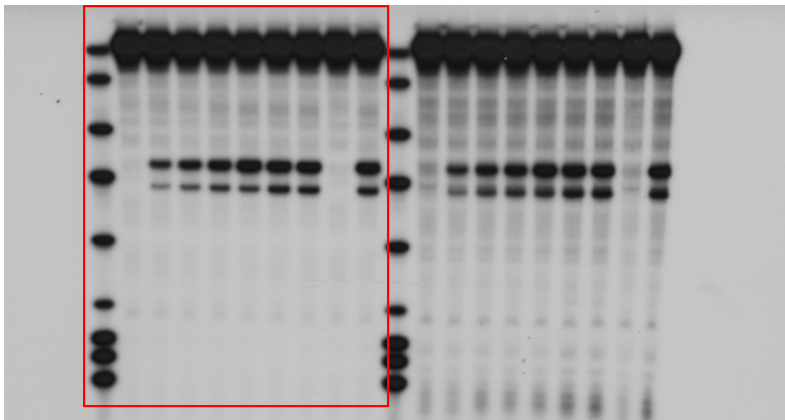

**Fig. 5D**

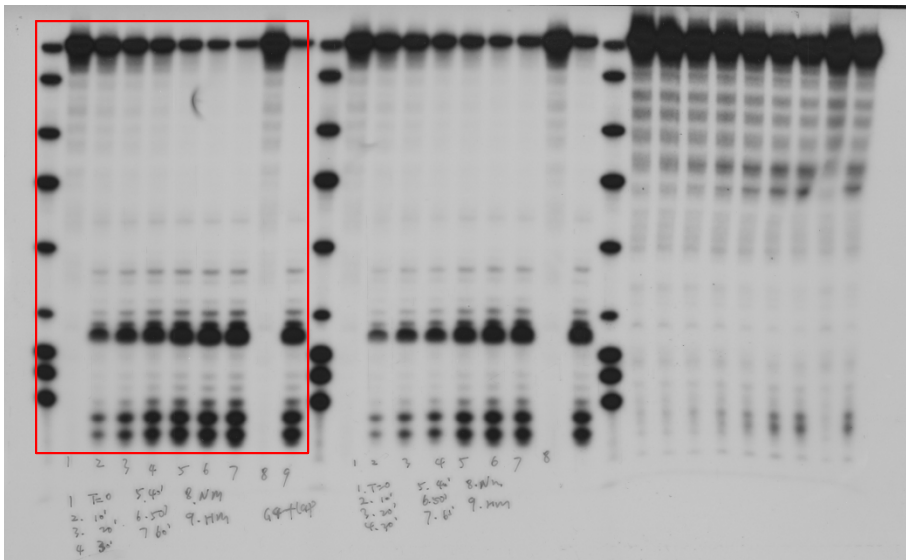

Supplement: emboj201388df5.pdf [file emboj201388df5.pdf]
